# ***locBLAST v2.0* - an improved PHP library for embedding standalone NCBI BLAST+ program to an interactive graphical user interface**

T. Ashok Kumar

Department of Bioinformatics, Noorul Islam College of Arts and Science, Kumaracoil, Thuckalay  
629180, Tamil Nadu, INDIA

[ashok@biogem.org](mailto:ashok@biogem.org)

## **Abstract**

*Background:* NCBI BLAST is a most popularly used sequence analysis platform in a broad range of applications. The final release of standalone WWW BLAST server (wwwBLAST v2.2.26) of NCBI was officially released on May 10, 2004, and discontinued its support. Due to the popularity and high demand, the BLAST algorithms were refined with rich features and released as online BLAST, standalone BLAST+, BLAST RESTful service, and cloud BLAST server. *locBLAST v2.0* is a lightweight PHP library, designed in preference to WWW BLAST server. It masks command-line BLAST+ programs to a rich graphical user interface (GUI).

*Methods:* The *locBLAST v2.0* library was designed using PHP, CSS, pure JavaScript, and standalone NCBI BLAST+ executables.

*Results:* *locBLAST v2.0* provides an interactive web interface to input query sequences through the web form and provides a graphical report of the sequence alignment result. The graphical overview, tabular summary, and formatted sequence alignment of *locBLAST v2.0* result mimic to the native format of online NCBI BLAST result. It allows users to perform both local and online database search.

*Availability:* Freely available at <https://github.com/AshokHub/locBLAST>

**Keywords:** *locBLAST*, Local BLAST Search, NCBI BLAST+, Sequence Alignment, Embedding BLAST+

## **1. Introduction**

Sequence alignment is one of the best and well-known method in Bioinformatics for identifying the similarity between the two biological sequences through sequence alignment.

Through pairwise sequence alignment, it is possible to predict the structural, functional, and evolutionary relationship of the sequence. The NCBI BLAST (Basic Local Alignment Search Tool) (Altschul et al., 1990) offers different types of programs mainly used for finding local similarity between two biological sequences or a dataset. It provides integrative access to the various biological databases through the web user interface, command-line user interface, and application programming interface. NCBI BLAST+ (Camacho et al., 2009) is a standalone suite of command-line BLAST programs used to compare the query sequence with both online and offline databases. The NCBI BLAST+ executables and source codes (a subset of the NCBI C++ toolkit (Vakatov, 2004)) are freely available at NCBI FTP repository for download.

The standalone NCBI BLAST+ suite consists of various programs and utilities for the different types of sequence alignments, database creation, and data manipulations. The list of NCBI BLAST+ programs which can include with locBLAST v2.0 library is below. All the programs except RPS-BLAST and RPS-TBLASTN support both online and offline sequence database search, and customized BLAST search by changing advanced algorithm parameters (Fig. 1).

- BLASTN program compares the nucleotide query sequence with the nucleotide sequences in the database.
- BLASTP program compares the protein query sequence with the protein sequences in the database.
- BLASTX program translates the nucleotide query sequence and compares with the protein sequences in the database.
- TBLASTN program compares the protein query sequence with the nucleotide sequences in the database, by instantly translating the nucleotide sequences in the database before comparison.
- TBLASTX program compares the translated six reading frames of nucleotide query sequence with the translated six reading frames of nucleotide sequences in the database. The query is translated on the fly before searching sequences in the database.
- DELTA-BLAST (Boratyn et al., 2012) program compares the query protein sequence with the protein sequences in the database by constructing the position-specific scoring matrices (PSSM) from the conserved domain database search results.

- PSI-BLAST (Altschul et al., 1997) program compares the query protein sequence with the protein sequences in the conserved domain database using PSSM scores by position specific iteration method.
- RPS-BLAST program compares the query protein sequence with the protein sequences in the conserved domain database through profiles. It is a reverse of the PSI-BLAST search.
- RPS-TBLASTN program compares the translated six reading frames of nucleotide query sequence with the protein sequences in the conserved domain database through profiles.

The stand-alone NCBI BLAST+ must be installed and configured in each client machines for individual BLAST search. Moreover, the clients can't access other databases; and specialization is needed to perform the advanced BLAST search. To outcome the issues, *locBLAST* v2.0 is developed to host a graphical interfaced BLAST server which can accomplish online and offline database search. The default and advanced BLAST algorithm parameters in *locBLAST* v2.0 web form automatically adjust to the default options according to the BLAST+ program and database on selection. For each BLAST+ program, it has a short title with a hyperlink to the webpage containing a detailed description of the program and algorithm parameters.

## 2. Methods

The *locBLAST* v2.0 library is designed using PHP, CSS, and pure JavaScript. It functions under nine different phases: (i) FASTA file format validation, (ii) amino acid or nucleotide sequence validation, (iii) proper BLAST+ program parameters validation, (iv) back-end BLAST+ program execution, (v) BlastXML2 file parser (Ashok *et al.*, 2017), (vi) graphical overview of hits of sequence alignments display, (vii) display tabular format short summary of hits of sequence alignments, (viii) formatted three row of sequence alignment, and (ix) save sequence to the disk. The PHP script executes the NCBI BLAST+ programs using `exec()` function through passing parameters from the HTML form fields. *locBLAST* v2.0 allows users to submit input sequence either through the text area or file upload. The output of BLAST+ result is generated in plain HTML format or user interactive graphical format. In the graphical output, graphical overview (Fig. 2) and tabular summary are properly hyperlinked with tooltip text to the sequence alignments.

## 2.1 Implementation

The *locBLAST* v2.0 library is designed user-friendly for both beginners and developers. Implementation of *locBLAST* v2.0 to a local BLAST server consists of two simple stages: (i) Downloading and extracting files, scripts, and BLAST+ binaries from GitHub and NCBI FTP to the web directory, and (ii) Custom database preparation or modification.

### 2.1.1 Installation and configuration

*locBLAST* v2.0 can be easily installed in any PHP supporting webserver and platform. A brief step-wise instruction for setting *locBLAST* v2.0 is below:

- (1) Create a new directory named 'blast' (optional) in the web-server parent directory (usually named as 'htdocs', 'www', 'wwwroot', or 'webpath').
- (2) Download latest BLAST+ binaries from NCBI FTP repository (<ftp://ftp.ncbi.nih.gov/blast/executables/blast+/LATEST>) based on the platform and extract to the 'blast' directory.
- (3) Download *locBLAST* v2.0 from GitHub (<https://github.com/AshokHub/locBLAST>) and extract to the 'blast' directory.
- (4) Online biological databases can be downloaded from NCBI FTP repository (<ftp://ftp.ncbi.nih.gov/blast/db>) and moved to 'db' directory to perform database search in offline. A brief protocol for custom database preparation is explained in section 2.1.2.
- (5) Add or modify 'database name' and 'path of the database file' codes in 'index.php' and 'footer.php' script for the custom database accordingly (optional).
- (6) Open the URL [http\(s\)://<hostname>:<port>/blast](http(s)://<hostname>:<port>/blast) (for instance <http://localhost/blast>) in the web browser to enter the query sequence.
- (7) Choose appropriate BLAST program to use and database to search (Fig. 1).

The *locBLAST* v2.0 provides access to search online databases namely Non-Redundant Protein/Nucleotide Sequences (NR/NT), UniProtKB/Swiss-Prot (SwissProt), Reference Proteins Sequences (RefSeq\_Protein), Reference RNA Sequences (RefSeq\_RNA), Expressed Sequence Tags (EST), Protein Data Bank (PDB), and Patented Protein Sequences (PAT); but not limited.

## 2.1.2 Custom database preparation

The custom database preparation requires little technical knowledge of BLAST+ programs. BLAST+ program supports the nucleotide database, protein database, and conserved domain database search. After database preparation, the form fields to be added or modified to existing database list. A simple protocol for creating own database is below:

- For creating a nucleotide database – execute the following command-line  
**./makeblastdb -in db/test\_na.fas -out db/test\_na -dbtype nucl -title Test\_NA**
- For creating a protein database – execute the following command-line  
**./makeblastdb -in db/test\_aa.fas -out db/test\_aa -dbtype prot -title Test\_AA**
- For creating a RPS/PSI (CDD) database – execute the following command-line  
**./makeprofiledb -in db/CDD/test\_CDD\_db.pn -out db/CDD/test\_CDD\_db -dbtype rps -title Test\_CDD\_db**
- For creating a Delta (CDD) database – execute the following command-line  
**./makeprofiledb -in db/CDD/test\_Delta\_db.pn -out db/CDD/test\_Delta\_db -dbtype delta -title Test\_Delta\_db**

Where, the words represented in bold are keywords and should not be modified. The custom databases namely ‘Test\_NA’, ‘Test\_AA’, ‘Test\_CDD\_db’, ‘PDTDB’, and ‘Smart’ are included in the *locBLAST* v2.0 library for testing.

## 2.1.3 Database manipulation

The BLAST+ applications such as *blastdb\_aliastool*, *blast\_formatter*, *blastdbcheck*, *convert2blastmask*, *dustmasker*, *segmasker*, *blastcmd*, *makembindex*, and *windowmasker* are used for database manipulation or data retrieval purposes.

## 3. Results

The result page of *locBLAST* v2.0 search produces a graphical output which contains well-formatted sequence alignment, color key, and summary table closely similar to the online BLAST result. Moreover, the web form and result page contain hyperlinks linked to the source or anchors, and keywords are annotated with a brief description of the term by tooltip text.

The graphical output consists of five section: (i) program search parameters, (ii) distribution of top BLAST hits in a graph, (iii) summary table of BLAST hits, (iv) row-wise

alignment for each hits, and (v) Karlin-Altschul statistics (Fig. 3). Moreover, the database accession number and definition line in the graphical output are automatically annotated and hyperlinked to the source database entry based on the database identifiers namely *gb*, *emb*, *dbj*, *pir*, *prf*, *sp*, *pdb*, *pat*, *bbs*, *gnl*, and *ref*. In plain text output, the search result is presented by monospace text and interlinks to the sequence alignment hits (Fig. 4).

*locBLAST* v2.0 does not depend on any additional third-party scripts or plugins to run the NCBI BLAST+ program. It is platform independent and hence it works in most of the traditional and modern browsers. NCBI BLAST+ executables in the *locBLAST* v2.0 can be simply updated by downloading current release from NCBI FTP site and replacing the old executables. The current stable release of NCBI BLAST+ is v2.8.1 (as on January 11, 2019), distributed as source codes and compiled binaries for Windows, Linux, and Macintosh operating systems as the installable and compressed files. The *locBLAST* v2.0 PHP library and the test database files were freely available at GitHub under GNU General Public License v3.0.

## References

- Altschul, S.F., Gish, W., Miller, W., Myers, E.W., Lipman, D.J., 1990. Basic Local Alignment Search Tool. *J. Mol. Biol.* 215(3), 403–410. doi: 10.1016/S0022-2836(05)80360-2
- Camacho, C., Coulouris, G., Avagyan, V., Ma, N., Papadopoulos, J., Bealer, K., Madden, T.L., 2009. BLAST+: Architecture and Applications. *BMC Bioinformatics.* 10, 421. doi: 10.1186/1471-2105-10-421
- Vakatov, D., 2004. The NCBI C++ Toolkit Book. National Center for Biotechnology Information, USA.
- Boratyn, G.M., Schäffer, A.A., Agarwala, R., Altschul, S.F., Lipman, D.J., & Madden, T. L., 2012. Domain enhanced lookup time accelerated BLAST. *Biology Direct.* 7(1), 12. doi: 10.1186/1745-6150-7-12
- Altschul, S.F., Madden, T.L., Schäffer, A.A., Zhang, J., Zhang, Z., Miller, W., Lipman, D.J., 1997. Gapped BLAST and PSI-BLAST: a new generation of protein database search programs. *Nucleic Acids Res.* 25(17), 3389–3402. doi: 10.1093/nar/25.17.3389
- Ashok, K.T., Rajagopal, B., 2009. xmlBLASTparser v1.1 — A PHP Based NCBI BLAST XML Output Parser. *Int. J. Adv. Res. Comput. Sci.* 8(8), 230–232. doi: 10.26483/ijarcs.v8i8.4648

**locBLAST - local NCBI BLAST**

(1) Progress bar and status bar

**Program:** BlastP (2) [⇐ Compares Protein Query vs Protein Database](#)

**Database:** Protein/Nucleotide Sequences (NR/NT) (3)

Enter sequence in FASTA format (DEMO)

Or load it from disk:  No file chosen

**Output:** ☒ Graphical Overview ☐ Plain Text (4)

**Algorithm Parameters:** ☒ Default ☐ Advanced (5)

(6) ?

**Advanced Options**

**Maximum Target Sequences:** 50

**Expect Threshold:** 10.0

**Word Size:** 6 (7) Expected Number of Chance Matches in a Random Model

**Matrix:** BLOSUM62

**Gap Costs:** Existence: 11, Extension: 1

☐ **Filter Low Complexity Regions**

☐ **Mask for Lookup Table Only**

Fig. 1: Homepage of *locBLAST* v2.0 web form with default and advanced BLAST+ search options. (1) progress bar and status bar, (2) advanced BLAST+ programs deltablast, psiblast, rpsblast, and rpstblastn, (3) hyperlink to detailed program description page, with short title, (4) option to graphical or plain text output, (5) option to advanced search algorithm parameters, (6) tutorial page, and (7) mouse over tooltip text description of the keyword.

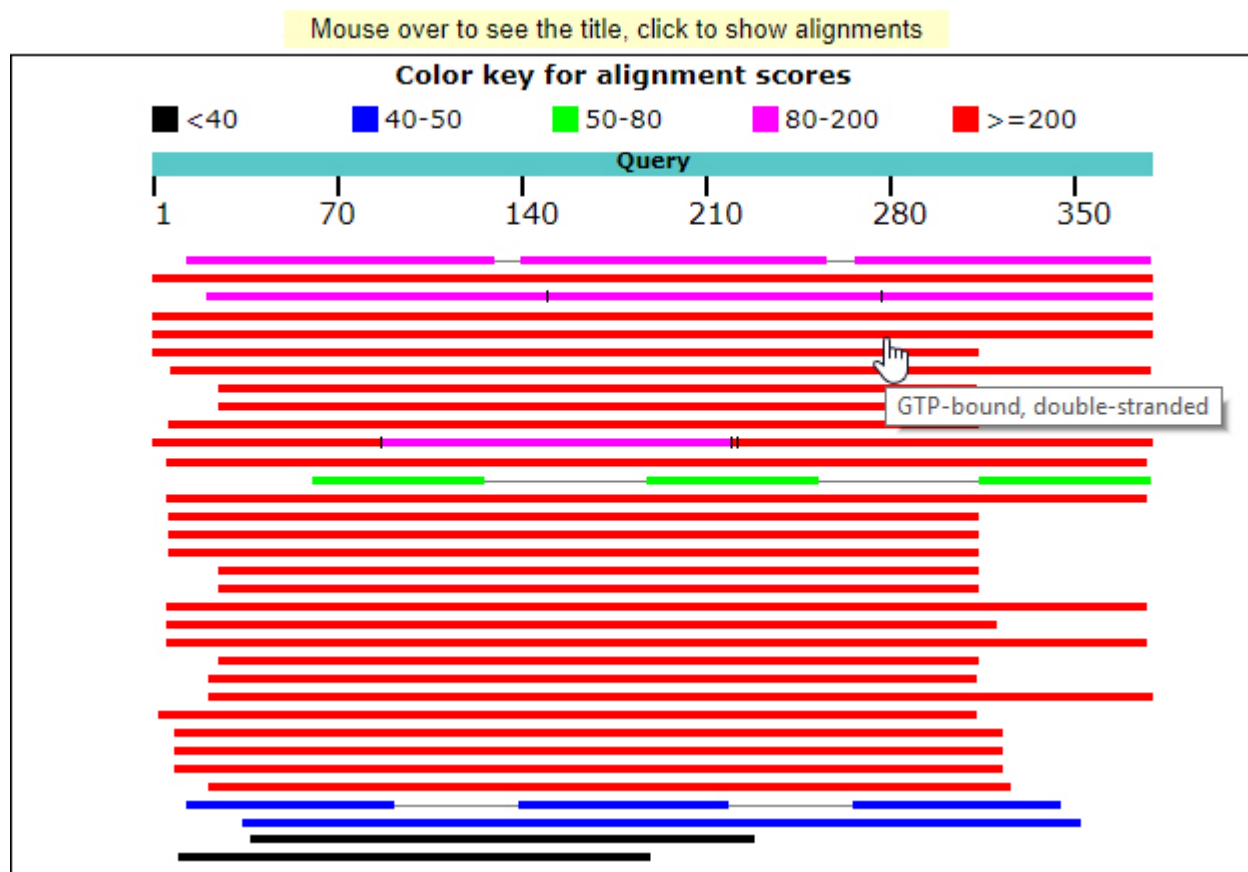

Fig. 2: Graphical overview of hits of sequence alignment sorted by scores (color keys), similar to native NCBI BLAST result.



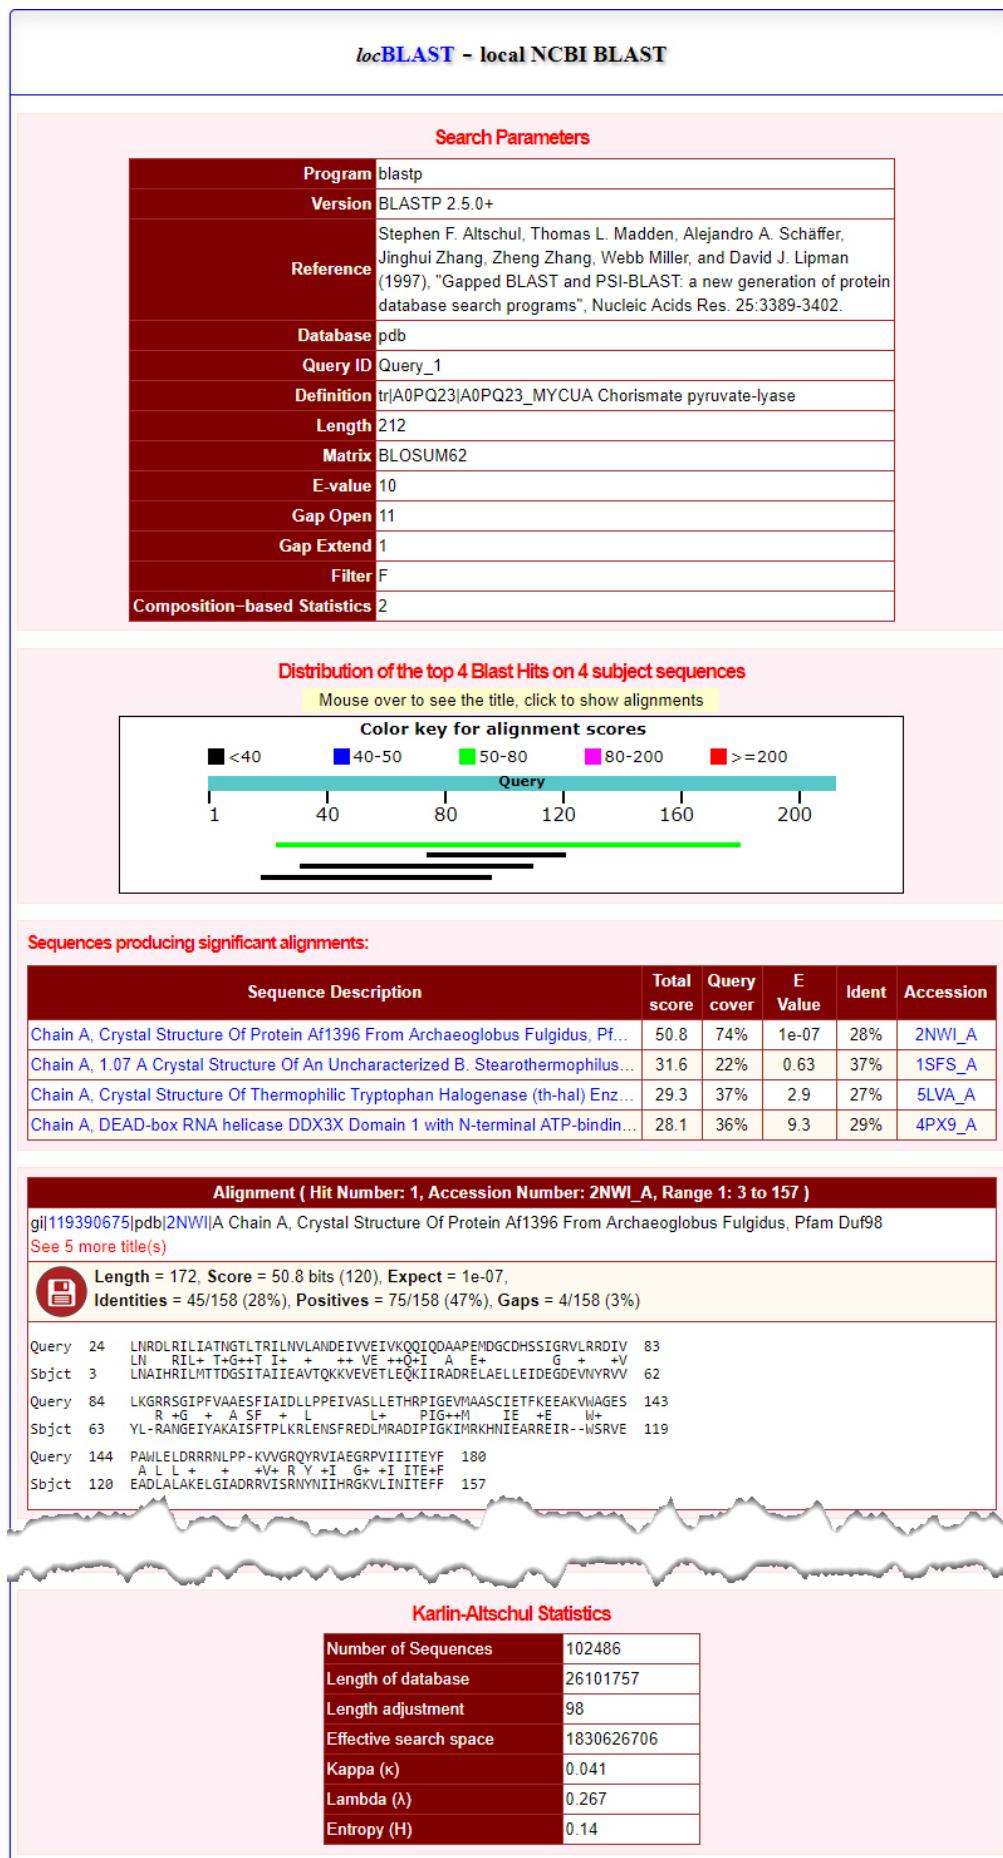

Fig. 3: Graphical output page of *locBLAST* v2.0 sequence search result (cropped large page).

**locBLAST - local NCBI BLAST**

BLASTP 2.5.0+

**Reference:**  
 Stephen F. Altschul, Thomas L. Madden, Alejandro A. Schäffer, Jinghui Zhang, Zheng Zhang, Webb Miller, and David J. Lipman (1997), "Gapped BLAST and PSI-BLAST: a new generation of protein database search programs", Nucleic Acids Res. 25:3389-3402.

**Reference for composition-based statistics:**  
 Alejandro A. Schäffer, L. Aravind, Thomas L. Madden, Sergei Shavirin, John L. Spouge, Yuri I. Wolf, Eugene V. Koonin, and Stephen F. Altschul (2001), "Improving the accuracy of PSI-BLAST protein database searches with composition-based statistics and other refinements", Nucleic Acids Res. 29:2994-3005.

Database: PDB protein database  
 102,486 sequences; 26,101,757 total letters

Query= tr|A0PQ23|A0PQ23\_MYCUA Chorismate pyruvate-lyase  
 Length=212  
 RID: XDVJAWX015

| Sequences producing significant alignments:                                                     | Score (Bits) | E Value |
|-------------------------------------------------------------------------------------------------|--------------|---------|
| pdb 2NWI A Chain A, Crystal Structure Of Protein Af1396 From Archaeoglobus Fulgidus, Pfam Duf98 | 50.8         | 1e-007  |
| pdb 1SFS A Chain A, 1.07 A Crystal Structure Of An Uncharacteriz...                             | 31.6         | 0.63    |
| pdb 5LVA A Chain A, Crystal Structure Of Thermophilic Tryptophan...                             | 29.3         | 2.9     |
| pdb 4PX9 A Chain A, DEAD-box RNA helicase DDX3X Domain 1 with N-...                             | 28.1         | 9.3     |

>pdb|2NWI|A Chain A, Crystal Structure Of Protein Af1396 From Archaeoglobus Fulgidus, Pfam Duf98  
 pdb|2NWI|B Chain B, Crystal Structure Of Protein Af1396 From Archaeoglobus Fulgidus, Pfam Duf98  
 pdb|2NWI|C Chain C, Crystal Structure Of Protein Af1396 From Archaeoglobus Fulgidus, Pfam Duf98  
 pdb|2NWI|D Chain D, Crystal Structure Of Protein Af1396 From Archaeoglobus Fulgidus, Pfam Duf98  
 pdb|2NWI|E Chain E, Crystal Structure Of Protein Af1396 From Archaeoglobus Fulgidus, Pfam Duf98  
 pdb|2NWI|F Chain F, Crystal Structure Of Protein Af1396 From Archaeoglobus Fulgidus, Pfam Duf98  
 Length=172

Score = 50.8 bits (120), Expect = 1e-007, Method: Compositional matrix adjust.  
 Identities = 45/158 (28%), Positives = 75/158 (47%), Gaps = 4/158 (3%)

Query 24 LNRDLRLIATNGTLTRILNVLANDEIVVEIVKQIQDAPEMDGCDHSSIGRVLRRDIV 83  
 LN RIL+ T+G++T I+ + ++ VE ++Q+I A E+ G + +V  
 Sbjct 3 LNAIHRILMTTDSITAIIEAVTKKVEVETLEQKIIRADRELAELLEIDEGDEVNYRVV 62

Query 84 LKGRRSQIPFVAASFIAIDLLPPEIVASLLLETHRPIGEVMAASCIETFKKEAKVWAGES 143  
 R +G + A SF + L L+ PIG++M IE +E W+  
 Sbjct 63 YL-RANGEIYAKAISFTPLKRLNSFREDLMRADIPGKIMRKHNIEARREIR--WSRVE 119

Query 144 PAWLLEDRRRNLPP-KVVGQRQYRVIAEGRPVIIITEYF 180  
 A L L + + +V+ R Y +I G+ +I ITE+F  
 Sbjct 120 EADLALAKELGIADRRVISRNNYIIHRGKVLINITEFF 157

Lambda K H  
 0.321 0.137 0.394

Gapped  
 Lambda K H  
 0.267 0.0410 0.140

Effective search space used: 1830626706

Database: PDB protein database  
 Posted date: Oct 26, 2018 10:26 AM  
 Number of letters in database: 26,101,757  
 Number of sequences in database: 102,486

Matrix: BLOSUM62  
 Gap Penalties: Existence: 11, Extension: 1  
 Neighboring words threshold: 11  
 Window for multiple hits: 40

Fig. 4: Plain text output page of *locBLAST* v2.0 sequence search result (cropped large page).

## locBLAST - local NCBI BLAST

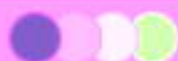

1

Program: BlastP

⇐ Compares Protein Query vs Protein Database

Database:

Protein/Nucleotide Sequences (NR/NT)

Enter sequence

FASTA format (DEMO)

BlastN  
BlastP  
BlastX  
tBlastN  
tBlastX  
DeltaBlast  
PSI-Blast  
RPS-Blast  
RPS-tBlastN

Or load it from disk

Choose File

No file chosen

Output: • Graphical Overview

Plain Text

Algorithm Parameters: • Default

Advanced

Reset

Clear Sequence

Search

Advanced Options

Maximum Target Sequences: 50

Expect Threshold: 10.0

Word Size: 6

Expected Number of Chance Matches in a Random Model

Matrix: BLOSUM62

Gap Costs: Existence: 11, Extension: 1

☐ Filter Low Complexity Regions

☐ Mask for Lookup Table Only

Reset

Advanced Search

Mouse over to see the title, click to show alignments

### Color key for alignment scores

■ <40

■ 40-50

■ 50-80

■ 80-200

■ ≥200

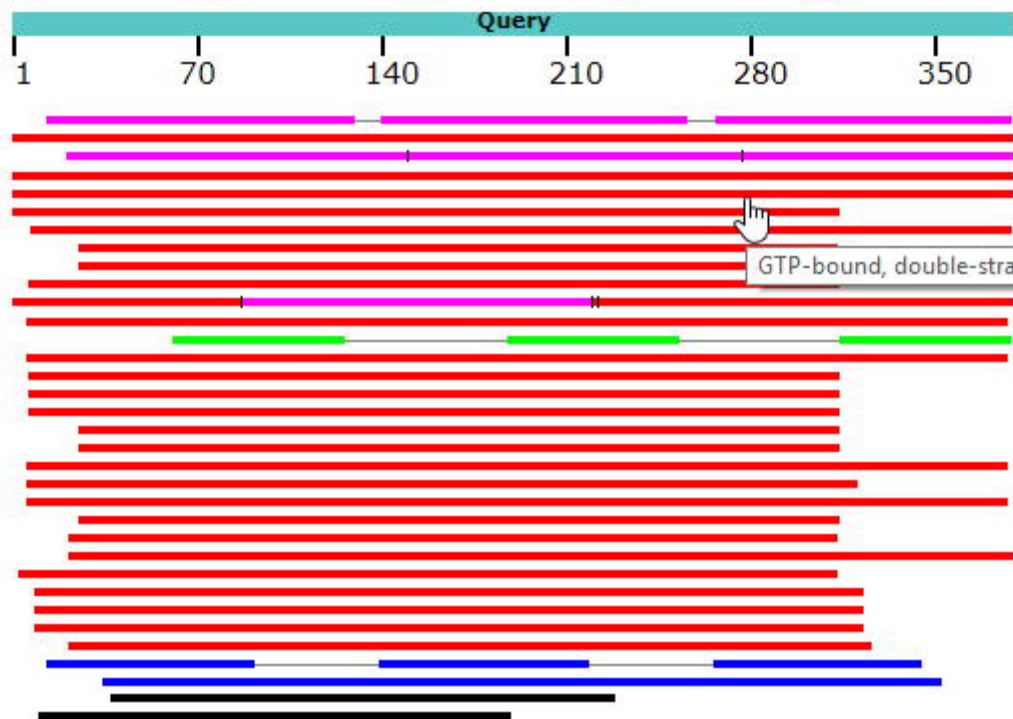



Search Parameters

|                              |                                                                                                                                                                                                                                                         |
|------------------------------|---------------------------------------------------------------------------------------------------------------------------------------------------------------------------------------------------------------------------------------------------------|
| Program                      | blastp                                                                                                                                                                                                                                                  |
| Version                      | BLASTP 2.5.0+                                                                                                                                                                                                                                           |
| Reference                    | Stephen F. Altschul, Thomas L. Madden, Alejandro A. Schäffer, Jinghui Zhang, Zheng Zhang, Webb Miller, and David J. Lipman (1997), "Gapped BLAST and PSI-BLAST: a new generation of protein database search programs", Nucleic Acids Res. 25:3389-3402. |
| Database                     | pdb                                                                                                                                                                                                                                                     |
| Query ID                     | Query_1                                                                                                                                                                                                                                                 |
| Definition                   | tr A0PQ23 A0PQ23_MYCUA Chorismate pyruvate-lyase                                                                                                                                                                                                        |
| Length                       | 212                                                                                                                                                                                                                                                     |
| Matrix                       | BLOSUM62                                                                                                                                                                                                                                                |
| E-value cutoff               | 1                                                                                                                                                                                                                                                       |
| Gap Open                     | 11                                                                                                                                                                                                                                                      |
| Gap Extend                   | 1                                                                                                                                                                                                                                                       |
| Filter                       | F                                                                                                                                                                                                                                                       |
| Composition-based Statistics | 2                                                                                                                                                                                                                                                       |

bioRxiv preprint doi: <https://doi.org/10.1101/336225>; this version posted February 21, 2019. The copyright holder for this preprint (which was not certified by peer review) is the author/funder, who has granted bioRxiv a license to display the preprint in perpetuity. It is made available under aCC-BY-NC-ND 4.0 International license.

Distribution of the top 4 Blast Hits on 4 subject sequences

Mouse over to see the title, click to show alignments

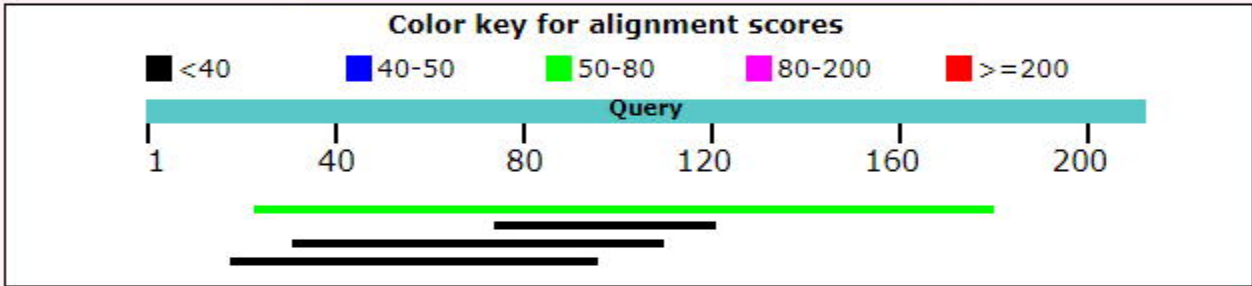

Sequences producing significant alignments:

| Sequence Description                                                                 | Total score | Query cover | E Value | Ident | Accession |
|--------------------------------------------------------------------------------------|-------------|-------------|---------|-------|-----------|
| Chain A, Crystal Structure Of Protein Af1396 From Archaeoglobus Fulgidus, Pfam Duf98 | 50.8        | 74%         | 1e-07   | 28%   | 2NWI_A    |
| Chain A, 1.07 A Crystal Structure Of An Uncharacterized B. Stearotherophilus...      | 31.6        | 22%         | 0.63    | 37%   | 1SFS_A    |
| Chain A, Crystal Structure Of Thermophilic Tryptophan Halogenase (th-hal) Enz...     | 29.3        | 37%         | 2.9     | 27%   | 5LVA_A    |
| Chain A, DEAD-box RNA helicase DDX3X Domain 1 with N-terminal ATP-bindin...          | 28.1        | 36%         | 9.3     | 29%   | 4PX9_A    |

Alignment ( Hit Number: 1, Accession Number: 2NWI\_A, Range 1: 3 to 157 )

gi|119390675|pdb|2NWI|A Chain A, Crystal Structure Of Protein Af1396 From Archaeoglobus Fulgidus, Pfam Duf98  
See 5 more title(s)

 Length = 172, Score = 50.8 bits (120), Expect = 1e-07,  
Identities = 45/158 (28%), Positives = 75/158 (47%), Gaps = 4/158 (3%)

|       |     |                                                             |     |
|-------|-----|-------------------------------------------------------------|-----|
| Query | 24  | LNRDLRILATNGTLTRILNVLANDEIVVEIVKQOIQDAAPENDGCDHSSIGRVLRRDIV | 83  |
| Sbjct | 3   | LN RIL+ T+G++T I+ + ++ VE ++Q+I A E+ G + +V                 | 62  |
| Query | 84  | LKGRRSVIPFVAESFIAIDLLPPEIVASLLETHRPIGEVMAASCIETFKEEAKVWAGES | 143 |
| Sbjct | 63  | YL-RANGEIYAKAISFTPLKRLNSFRDLRADIPIGKIMRKHNIARREIR--WSRVE    | 119 |
| Query | 144 | PAWLELDRRRLNPP-KVVGROQYRVIAEGRPVIIITEYF                     | 180 |
| Sbjct | 120 | A L L + + +V+ R Y +I G+ +I ITE+F                            | 157 |

Karlin-Altschul Statistics

|                        |            |
|------------------------|------------|
| Number of Sequences    | 102486     |
| Length of database     | 26101757   |
| Length adjustment      | 98         |
| Effective search space | 1830626706 |
| Kappa (κ)              | 0.041      |
| Lambda (λ)             | 0.267      |
| Entropy (H)            | 0.14       |



# locBLAST - local NCBI BLAST

BLASTP 2.5.0+

## Reference:

Stephen F. Altschul, Thomas L. Madden, Alejandro A. Schäffer, Jinghui Zhang, Zheng Zhang, Webb Miller, and David J. Lipman (1997), "Gapped BLAST and PSI-BLAST: a new generation of protein database search programs", Nucleic Acids Res. 25:3389-3402.

## Reference for

### composition-based statistics:

Alejandro A. Schäffer, L. Aravind, Thomas L. Madden, Sergei Shavirin, John L. Spouge, Yuri I. Wolf, Eugene V. Koonin, and Stephen F. Altschul (2001), "Improving the accuracy of PSI-BLAST protein database searches with composition-based statistics and other refinements", Nucleic Acids Res. 29:2994-3005.

Database: PDB protein database

102,486 sequences; 26,101,757 total letters  
bioRxiv preprint doi: <https://doi.org/10.1101/556229>; this version posted February 21, 2019. The copyright holder for this preprint (which was not certified by peer review) is the author/funder, who has granted bioRxiv a license to display the preprint in perpetuity. It is made available under aCC-BY-NC-ND 4.0 International license.

Query= tr|A0PQ23|A0PQ23\_MYCUA Chorismate pyruvate-lyase

Length=212

RID: XDVJAW0X015

| Sequences producing significant alignments: |                                                          |  | Score<br>(Bits) | E<br>Value |
|---------------------------------------------|----------------------------------------------------------|--|-----------------|------------|
| pdb 2NWI A                                  | Chain A, Crystal Structure Of Protein Af1396 From Arc... |  | 50.8            | 1e-007     |
| pdb 1SFS A                                  | Chain A, 1.07 A Crystal Structure Of An Uncharacteriz... |  | 31.6            | 0.63       |
| pdb 5LVA A                                  | Chain A, Crystal Structure Of Thermophilic Tryptophan... |  | 29.3            | 2.9        |
| pdb 4PX9 A                                  | Chain A, DEAD-box RNA helicase DDX3X Domain 1 with N...  |  | 28.1            | 9.3        |

>pdb|2NWI|A Chain A, Crystal Structure Of Protein Af1396 From Archaeoglobus Fulgidus, Pfam Duf98  
pdb|2NWI|B Chain B, Crystal Structure Of Protein Af1396 From Archaeoglobus Fulgidus, Pfam Duf98  
pdb|2NWI|C Chain C, Crystal Structure Of Protein Af1396 From Archaeoglobus Fulgidus, Pfam Duf98  
pdb|2NWI|D Chain D, Crystal Structure Of Protein Af1396 From Archaeoglobus Fulgidus, Pfam Duf98  
pdb|2NWI|E Chain E, Crystal Structure Of Protein Af1396 From Archaeoglobus Fulgidus, Pfam Duf98  
pdb|2NWI|F Chain F, Crystal Structure Of Protein Af1396 From Archaeoglobus Fulgidus, Pfam Duf98  
Length=172

Score = 50.8 bits (120), Expect = 1e-007, Method: Compositional matrix adjust.  
Identities = 45/158 (28%), Positives = 75/158 (47%), Gaps = 4/158 (3%)

|       |     |                                                               |     |
|-------|-----|---------------------------------------------------------------|-----|
| Query | 24  | LNRDLRILIATNGTLTRILNVLANDEIVVEIVKQIQDAAPEMDGCDHSSIGRVLRRDIV   | 83  |
|       |     | LN RIL+ T+G++T I+ + ++ VE ++Q+I A E+ G + +V                   |     |
| Sbjct | 3   | LNAIHRILMTDGSITAIIEAVTQKKVEVETLEQKIIRADRELAELLEIDEGDEVNVRV    | 62  |
| Query | 84  | LKGRRSIGIPFVAAESFIAIDLLPPEIVASLLETHRPIGEVMAASCIETFKEEAKVWAGES | 143 |
|       |     | R +G + A SF + L L+ PIG++M IE +E W+                            |     |
| Sbjct | 63  | YL-RANGEIYAKAISFTPLKRLNSFREDLMRADIPIGKIMRKHNIARREIR--WSRVE    | 119 |
| Query | 144 | PAWLELDRRRLNPP-KVVGRQYRVIAEGRPVIIITEYF                        | 180 |
|       |     | A L L + + +V+ R Y +I G+ +I ITE+F                              |     |
| Sbjct | 120 | EADLALAKELGIADRRVISRNYNIIHRGKVLINITEFF                        | 157 |

Lambda K H  
0.321 0.137 0.394

Gapped  
Lambda K H  
0.267 0.0410 0.140

Effective search space used: 1830626706

Database: PDB protein database  
Posted date: Oct 26, 2018 10:26 AM  
Number of letters in database: 26,101,757  
Number of sequences in database: 102,486

Matrix: BLOSUM62  
Gap Penalties: Existence: 11, Extension: 1  
Neighboring words threshold: 11  
Window for multiple hits: 40
